# Supplementary material for: Controllable synthesis of Fe5(PO4)4(OH)3·2H2O as a highly efficient heterogeneous Fenton-like catalyst
Source: Royal Society of Chemistry journal article supplement (doi:10.1039/c1ce05483j), 2011-01-01
Supplement: c1ce05483j.pdf [file c1ce05483j.pdf]

# Supporting Information

## **Controllable synthesis of $\text{Fe}_5(\text{PO}_4)_4(\text{OH})_3 \cdot 2\text{H}_2\text{O}$ as a highly efficient heterogeneous Fenton-like catalysts**

Di Li, Chengsi Pan, Rui Shi, Yongfa, Zhu\*

Department of Chemistry, Tsinghua University, Beijing, 100084, China

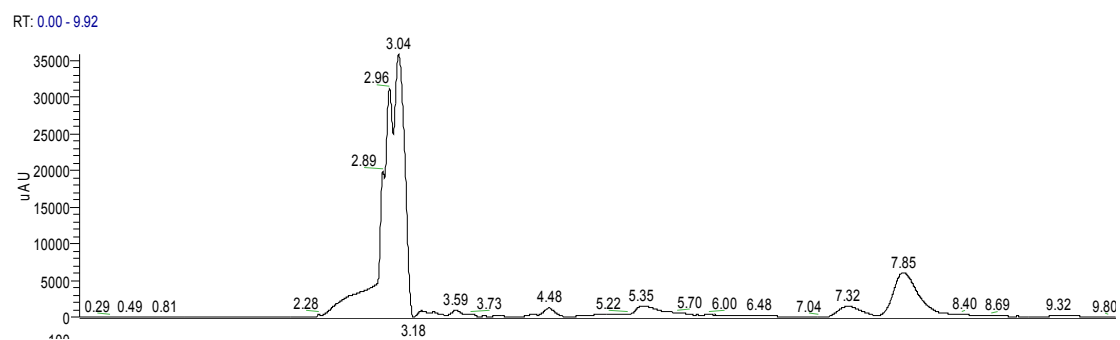

Figure 1. Chromatograms of MB [ $\text{Fe}_5(\text{PO}_4)_4(\text{OH})_3 \cdot 2\text{H}_2\text{O}$ :  $0.5 \text{ g L}^{-1}$ ;  $\text{H}_2\text{O}_2$ :  $9.8 \text{ mM}$ ; MB:  $1 \times 10^{-5} \text{ M}$ ] degradation products irradiated for 6h in methanol–water (35:65, v/v) eluent.

Table 1

Suggested structures for the intermediates based on LC–MS results.

| Retention time, $t_R$ (min) | Structural formula                                                                   | Molecular weight |
|-----------------------------|--------------------------------------------------------------------------------------|------------------|
| 3.04                        | 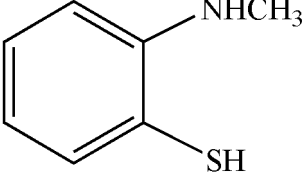   | 139              |
| 5.35                        |  | 228              |
| 7.85                        |  | 269              |

Ultraviolet light was obtained by a 12 W Hg lamp ( $\lambda = 254$  nm, the Institute of Electric Light Sources, Beijing) and the average light intensity was  $1 \text{ mW cm}^{-2}$ . The radiant flux was measured with a power meter (the Institute of Electric Light Sources, Beijing). The average light intensity of solar light was  $40 \text{ mW cm}^{-2}$ . The radiant flux was measured with a power meter (the Institute of Electric Light Sources, Beijing).

Both the result of reaction carried out using UV source and solar light were shown in Fig. 2. The photodegradation reaction under solar light was far more than UV light. Photosensitization principle promoted degradation, and the reaction mechanism was shown in Scheme 1.

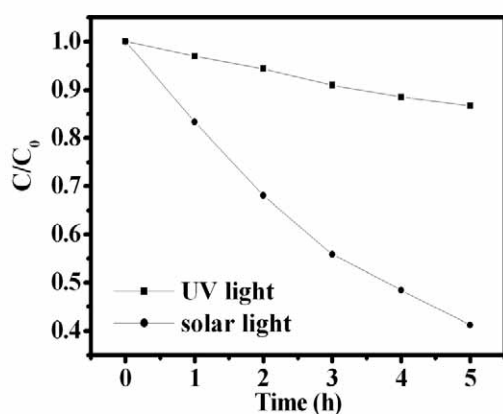

Fig. 2 Photocatalytic degradation of MB by  $\text{Fe}_5(\text{PO}_4)_4(\text{OH})_3 \cdot 2\text{H}_2\text{O}$  under different light source irradiation.

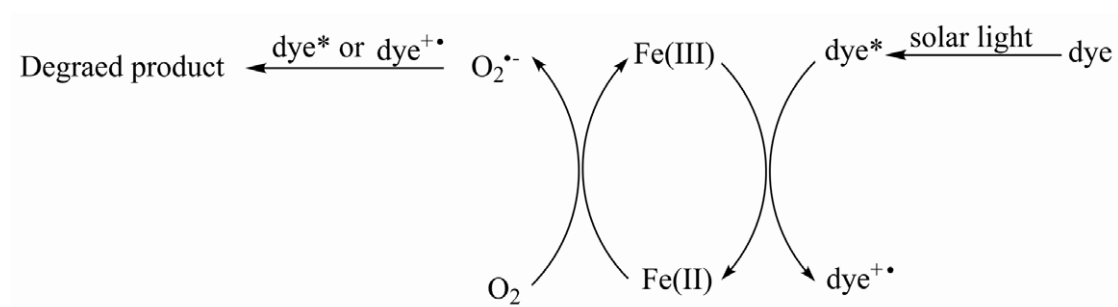

Scheme 1 The mechanism of photodegradation reaction under solar light.

The extent of mineralization of MB was examined by determination of residual total organic carbon (TOC). Temporal changes of TOC during the photodegradation process of MB were depicted in Fig. 3. The TOC in the solution displayed limited and

slow decrease during the irradiation period.

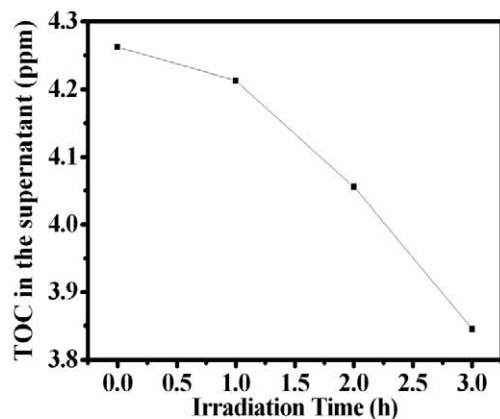

Fig. 3 Temporal changes in total organic carbon (TOC) in the degraded bulk solution during the photodegradation of MB process.

$\text{Fe}_5(\text{PO}_4)_4(\text{OH})_3 \cdot 2\text{H}_2\text{O}$  as a kind of heterogeneous photocatalyst could be easily recycled by a simple filtration. After three recycles for the photodegradation of MB, the catalyst did not exhibit any significant loss of activity, as shown in Fig. 4.

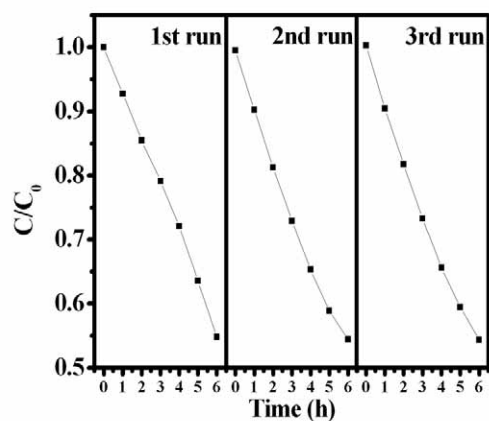

Fig. 4 Cycling runs in the photocatalytic degradation of MB in the presence of  $\text{Fe}_5(\text{PO}_4)_4(\text{OH})_3 \cdot 2\text{H}_2\text{O}$  under visible light irradiation;  $\text{Fe}_5(\text{PO}_4)_4(\text{OH})_3 \cdot 2\text{H}_2\text{O}$  loading,  $0.5 \text{ g L}^{-1}$ ; initial concentration of MB,  $10^{-5} \text{ M}$ ;  $\lambda > 420 \text{ nm}$ .
